# Supplementary material
Source: PubMed Central journal article supplement (PMC4136281)
Supplement: JVI.00830-14_zjv999099341so1.pdf [file JVI.00830-14_zjv999099341so1.pdf]

**TABLE S1** IAV-NS1/NS2-interacting proteins identified by SILAC-based MS-/ MaxQuant.

| Protein ID | Protein                                                                        | Gene         | No. unique peptides | Ratio M/L (normalized) | Sequence coverage [%] |
|------------|--------------------------------------------------------------------------------|--------------|---------------------|------------------------|-----------------------|
| P42336     | Phosphatidylinositol 4,5-bisphosphate 3-kinase catalytic subunit alpha isoform | PIK3CA       | 4                   | 6.73                   | 3.40                  |
| E9PFP1     | Phosphatidylinositol 3-kinase regulatory subunit beta                          | PIK3R2       | 23                  | 5.90                   | 40.70                 |
| O14654     | Insulin receptor substrate 4                                                   | IRS4         | 23                  | 5.31                   | 23.40                 |
| P0CG48     | Ubiquitin                                                                      | UBC          | 4                   | 4.67                   | 55.20                 |
| O00487     | 26S proteasome non-ATPase regulatory subunit 14                                | PSMD14       | 3                   | 4.47                   | 11.60                 |
| C9IZE4     | 26S proteasome non-ATPase regulatory subunit 6                                 | PSMD6        | 4                   | 4.34                   | 10.90                 |
| F5GX82     | Protein furry homolog-like                                                     | FRYL         | 15                  | 4.28                   | 5.40                  |
| Q9BZJ0     | Crooked neck-like protein 1                                                    | CRNKL1       | 8                   | 4.18                   | 11.00                 |
| P51665     | 26S proteasome non-ATPase regulatory subunit 7                                 | PSMD7        | 3                   | 3.97                   | 9.90                  |
| P52298     | Nuclear cap-binding protein subunit 2                                          | NCBP2        | 3                   | 3.85                   | 19.20                 |
| Q9UNM6     | 26S proteasome non-ATPase regulatory subunit 13                                | PSMD13       | 7                   | 3.83                   | 19.10                 |
| O14818     | Proteasome subunit alpha type-7                                                | PSMA7        | 6                   | 3.67                   | 26.60                 |
| O00469-2   | Procollagen-lysine,2-oxoglutarate 5-dioxygenase 2                              | PLOD2        | 8                   | 3.49                   | 12.30                 |
| Q13200     | 26S proteasome non-ATPase regulatory subunit 2                                 | PSMD2        | 13                  | 3.49                   | 16.70                 |
| E7ENU4     | Double-stranded RNA-specific adenosine deaminase                               | ADAR         | 34                  | 3.08                   | 30.60                 |
| Q9NNW5     | WD repeat-containing protein 6                                                 | WDR6         | 5                   | 3.04                   | 5.10                  |
| Q99460     | 26S proteasome non-ATPase regulatory subunit 1                                 | PSMD1        | 8                   | 3.02                   | 13.00                 |
| O75569     | Interferon-inducible double stranded RNA-dependent protein kinase activator A  | PRKRA (PACT) | 4                   | 2.98                   | 14.10                 |
| P38919     | Eukaryotic initiation factor 4A-III, DDX48                                     | EIF4A3       | 15                  | 2.88                   | 36.00                 |
| Q8TCS8     | Polyribonucleotide nucleotidyltransferase 1, mitochondrial                     | PNPT1        | 4                   | 2.88                   | 6.30                  |
| P27986-4   | Phosphatidylinositol 3-kinase regulatory subunit alpha                         | PIK3R1       | 4                   | 2.87                   | 7.00                  |
| B4DQJ1     | U5 small nuclear ribonucleoprotein 40 kDa protein                              | SNRNP40      | 3                   | 2.73                   | 5.60                  |
| Q9UKM9     | RNA-binding protein Raly                                                       | RALY         | 11                  | 2.70                   | 47.40                 |
| Q96A72     | Protein mago nashi homolog 2;Protein mago nashi homolog                        | MAGOHB       | 5                   | 2.68                   | 31.80                 |
| Q13573     | SNW domain-containing protein 1                                                | SNW1         | 8                   | 2.64                   | 19.60                 |
| P25788     | Proteasome subunit alpha type-3                                                | PSMA3        | 3                   | 2.63                   | 12.20                 |
| O00231     | 26S proteasome non-ATPase regulatory subunit 11                                | PSMD11       | 8                   | 2.60                   | 21.30                 |
| Q9BWF3     | RNA-binding protein 4;RNA-binding protein 4B                                   | RBM4;RBM4B   | 3                   | 2.59                   | 14.60                 |
| Q9Y265     | RuvB-like 1                                                                    | RUVBL1       | 11                  | 2.57                   | 31.10                 |
| Q9HCE1     | Putative helicase MOV-10                                                       | MOV10        | 18                  | 2.54                   | 18.90                 |
| Q9Y3C6     | Peptidyl-prolyl cis-trans isomerase-like 1                                     | PPIL1        | 4                   | 2.54                   | 31.30                 |
| O00232     | 26S proteasome non-ATPase regulatory subunit 12                                | PSMD12       | 5                   | 2.52                   | 9.40                  |
| O75746     | Calcium-binding mitochondrial carrier protein Aralar1                          | SLC25A12     | 4                   | 2.50                   | 12.40                 |
| O43242     | 26S proteasome non-ATPase regulatory subunit 3                                 | PSMD3        | 4                   | 2.47                   | 9.00                  |

|          |                                                       |          |    |      |       |
|----------|-------------------------------------------------------|----------|----|------|-------|
| Q9Y230   | RuvB-like 2                                           | RUVBL2   | 13 | 2.47 | 28.50 |
| O43592   | Exportin-T                                            | XPOT     | 7  | 2.43 | 7.70  |
| P07910-2 | Heterogeneous nuclear ribonucleoproteins C1/C2        | HNRNPC   | 14 | 2.39 | 66.60 |
| Q8IX01   | SURP and G-patch domain-containing protein 2          | SUGP2    | 16 | 2.39 | 15.80 |
| P04792   | Heat shock protein beta-1                             | HSPB1    | 3  | 2.35 | 18.00 |
| O60306   | Intron-binding protein aquarius                       | AQR      | 7  | 2.32 | 4.80  |
| Q15029   | 116 kDa U5 small nuclear ribonucleoprotein component  | EFTUD2   | 11 | 2.31 | 12.70 |
| Q4VC03   | Polyadenylate-binding protein 4                       | PABPC4   | 7  | 2.30 | 26.70 |
| Q15459   | Splicing factor 3A subunit 1                          | SF3A1    | 8  | 2.29 | 10.70 |
| O95831   | Apoptosis-inducing factor 1, mitochondrial            | AIFM1    | 9  | 2.29 | 14.50 |
| Q92900   | Regulator of nonsense transcripts 1                   | UPF1     | 14 | 2.25 | 11.80 |
| A5YKK6   | CCR4-NOT transcription complex subunit 1              | CNOT1    | 3  | 2.24 | 1.20  |
| P82650   | 28S ribosomal protein S22, mitochondrial              | MRPS22   | 5  | 2.22 | 15.60 |
| Q9NV11   | Fanconi anemia group I protein                        | FANCI    | 5  | 2.16 | 5.00  |
| Q13595   | Transformer-2 protein homolog alpha                   | TRA2A    | 3  | 2.11 | 11.30 |
| P35998   | 26S protease regulatory subunit 7                     | PSMC2    | 3  | 2.10 | 7.90  |
| Q4VCS5   | Angiomotin                                            | AMOT     | 4  | 2.09 | 3.10  |
| Q92616   | Translational activator GCN1                          | GCN1L1   | 13 | 2.08 | 5.00  |
| Q00610   | Clathrin heavy chain 1                                | CLTC     | 8  | 2.07 | 5.00  |
| B1AM49   | ELAV-like protein 2                                   | ELAVL2   | 3  | 2.06 | 19.60 |
| O14980   | Exportin-1                                            | XPO1     | 7  | 2.05 | 7.30  |
| Q6P2Q9   | Pre-mRNA-processing-splicing factor 8                 | PRPF8    | 11 | 2.01 | 4.50  |
| Q12874   | Splicing factor 3A subunit 3                          | SF3A3    | 5  | 2.00 | 10.00 |
| Q546F9   | Calcium-binding mitochondrial carrier protein Aralar2 | SLC25A13 | 14 | 2.00 | 28.70 |
| P55081   | Microfibrillar-associated protein 1                   | MFAP1    | 4  | 2.00 | 11.60 |
| B4DRT24  | 28S ribosomal protein S27, mitochondrial              | MRPS27   | 6  | 1.97 | 16.60 |
| E9PF26   | Double-stranded RNA-binding protein Staufen homolog 2 | STAU2    | 9  | 1.97 | 20.90 |
| P52272   | Heterogeneous nuclear ribonucleoprotein M             | HNRNPM   | 29 | 1.95 | 49.90 |
| P53985   | Monocarboxylate transporter 1                         | SLC16A1  | 3  | 1.95 | 7.80  |
| Q13435   | Splicing factor 3B subunit 2                          | SF3B2    | 16 | 1.94 | 21.30 |
| Q5VWC4   | 26S proteasome non-ATPase regulatory subunit 4        | PSMD4    | 3  | 1.90 | 9.70  |
| P11940   | Polyadenylate-binding protein 1                       | PABPC1   | 7  | 1.90 | 39.80 |
| O75643   | U5 small nuclear ribonucleoprotein 200 kDa helicase   | SNRNP200 | 19 | 1.87 | 9.60  |
| P51398   | 28S ribosomal protein S29, mitochondrial              | DAP3     | 3  | 1.87 | 10.10 |
| Q15393   | Splicing factor 3B subunit 3                          | SF3B3    | 18 | 1.86 | 15.60 |
| Q09161   | Nuclear cap-binding protein subunit 1                 | NCBP1    | 14 | 1.85 | 21.50 |
| P05141   | ADP/ATP translocase 2                                 | SLC25A5  | 4  | 1.84 | 27.20 |
| A8MXP9   | Matrin-3                                              | MATR3    | 30 | 1.82 | 37.30 |

|          |                                                          |          |    |      |       |
|----------|----------------------------------------------------------|----------|----|------|-------|
| P53618   | Coatomer subunit beta                                    | COPB1    | 4  | 1.80 | 5.60  |
| P62995   | Transformer-2 protein homolog beta                       | TRA2B    | 4  | 1.80 | 14.90 |
| Q8WUM0   | Nuclear pore complex protein Nup133                      | NUP133   | 5  | 1.80 | 4.70  |
| B2R4R0   | Histone H4                                               | HIST1H4A | 6  | 1.78 | 57.30 |
| Q9ULX6   | A-kinase anchor protein 8-like                           | AKAP8L   | 5  | 1.76 | 11.50 |
| Q99459   | Cell division cycle 5-like protein                       | CDC5L    | 8  | 1.76 | 11.80 |
| P30041   | Peroxiredoxin-6                                          | PRDX6    | 4  | 1.76 | 18.80 |
| Q00325   | Phosphate carrier protein, mitochondrial                 | SLC25A3  | 5  | 1.74 | 14.10 |
| Q8IZH2   | 5-3 exoribonuclease 1                                    | XRN1     | 5  | 1.71 | 3.10  |
| P12956   | X-ray repair cross-complementing protein 6               | XRCC6    | 13 | 1.70 | 24.60 |
| Q7L2E3-2 | Putative ATP-dependent RNA helicase DHX30                | DHX30    | 43 | 1.69 | 38.50 |
| Q53F19   | Uncharacterized protein C17orf85                         | C17orf85 | 4  | 1.65 | 8.40  |
| Q86X55   | Histone-arginine methyltransferase CARM1                 | CARM1    | 3  | 1.64 | 4.30  |
| Q9Y241-2 | HIG1 domain family member 1A                             | HIGD1A   | 3  | 1.63 | 44.90 |
| P78527   | DNA-dependent protein kinase catalytic subunit           | PRKDC    | 43 | 1.63 | 11.10 |
| Q96PU8   | Protein quaking                                          | QKI      | 4  | 1.62 | 12.00 |
| O75616   | GTPase Era, mitochondrial                                | ERAL1    | 4  | 1.60 | 9.60  |
| Q9BUJ2   | Heterogeneous nuclear ribonucleoprotein U-like protein 1 | HNRNPUL1 | 17 | 1.59 | 24.50 |
| Q9NR30   | Nucleolar RNA helicase 2                                 | DDX21    | 30 | 1.59 | 42.30 |
| A8MW61   | Pleiotropic regulator 1                                  | PLRG1    | 3  | 1.59 | 9.30  |
| Q5BKZ1   | DBIRD complex subunit ZNF326                             | ZNF326   | 14 | 1.58 | 25.80 |
| F5H3A1   | Sodium/potassium-transporting ATPase subunit alpha-1     | ATP1A1   | 8  | 1.57 | 17.00 |
| B4DR61   | Protein transport protein Sec61 subunit alpha isoform 1  | SEC61A1  | 3  | 1.57 | 6.00  |
| Q15428   | Splicing factor 3A subunit 2                             | SF3A2    | 3  | 1.56 | 7.80  |
| O75533   | Splicing factor 3B subunit 1                             | SF3B1    | 23 | 1.56 | 20.20 |
| Q13148-2 | TAR DNA-binding protein 43                               | TARDBP   | 4  | 1.56 | 12.00 |
| P52597   | Heterogeneous nuclear ribonucleoprotein F                | HNRNPF   | 9  | 1.55 | 36.60 |
| P07814   | Bifunctional glutamate/proline--tRNA ligase              | EPRS     | 8  | 1.55 | 6.30  |
| P08195-4 | 4F2 cell-surface antigen heavy chain                     | SLC3A2   | 4  | 1.52 | 6.20  |

M = medium (proteins derived from PR8-NS-FS infected cells)

L = light (proteins derived from PR8-wt infected cells)

All proteins that were identified in SILAC experiment with three or more peptides and an M/L ratio of >1.5 are shown.
